# Supplementary material for: Genome-Wide Analysis of the C2 Domain Family in Soybean and Identification of a Putative Abiotic Stress Response Gene GmC2-148
Source: Front Plant Sci. 2021 Feb 16;12:620544. doi: 10.3389/fpls.2021.620544 (PMC7939022; doi:10.3389/fpls.2021.620544)
Supplement: Supplementary Table 6 — Data of tissue-specific expression levels of C2 domain genes. [file Table_6.xlsx]

## Sheet: Sheet1
Supplementary Table S6. Transcript data of 69 C2 domain genes for heat map (FPKm).
Gene name	GeneID	young leaf	flower	nodule	root	one cm pod	pod shell 10DAF	pod shell 14DAF	seed 10DAF	seed 14DAF	seed 21DAF	seed 25DAF	seed 28DAF	seed 35DAF	seed 42DAF
GmC2-8	Glyma.02G137700	46	39	48	126	52	57	33	21	29	13	37	24	28	14
GmC2-12	Glyma.02G247900	19	19	24	40	23	21	81	60	138	99	182	63	77	32
GmC2-13	Glyma.02G248000	3	1	0	0	1	3	0	0	0	0	0	0	0	0
GmC2-14	Glyma.02G248100	0	92	0	0	0	0	0	0	0	0	0	0		0
GmC2-21	Glyma.03G015400	8	62	36	196	22	36	45	25	30	18	30	48	75	24
GmC2-28	Glyma.03G020800	178	125	145	166	155	133	71	46	67	33	77	61	87	44
GmC2-30	Glyma.03G242100	5	6	7	121	8	0	0	4	3	0	2	0	0	0
GmC2-31	Glyma.03G242200	10	11	20	105	0	0	0	0	0	0	1	2	0	0
GmC2-35	Glyma.04G141600	8	9	10	111	0	0	0	0	0	0	0	0	0	0
GmC2-36	Glyma.04G187900	0	17	87	1	5	3	1	12	7	0	7	5	8	6
GmC2-37	Glyma.04G201500	11	3	4	8	2	8	6	2	5	0	1	1	2	2
GmC2-41	Glyma.05G165900	3	3	3	3	3	3	3	3	3	3	3	3	3	3
GmC2-43	Glyma.05G204900	0	0	0	0	0	0	0	12	0	0	0	0	0	0
GmC2-44	Glyma.05G246400	0	31	29	0	0	0	0	1	0	0	0	0	0	0
GmC2-45	Glyma.06G003700	0	31	31	0	0	0	0	0	0	0	0	0	0	0
GmC2-47	Glyma.06G066600	0	9	10	5	5	3	8	3	1	6	5	10	16	5
GmC2-51	Glyma.06G163800	35	35	21	78	21	24	21	9	6	3	20	16	21	6
GmC2-52	Glyma.06G177800	1	80	0	1	0	1	0	0	2	0	8	9	16	2
GmC2-54	Glyma.06G292000	0	17	68	2	0	2	15	6	6	4	3	5	2	7
GmC2-58	Glyma.07G075300	9	45	25	295	62	71	91	71	70	37	72	90	86	26
GmC2-65	Glyma.07G082700	87	97	13	65	126	138	52	97	110	58	118	78	98	38
GmC2-67	Glyma.07G092400	22	41	17	106	7	13	2	1	3	0	1	1	1	3
GmC2-68	Glyma.07G102400	7	15	57	19	17	16	28	25	13	3	3	1	5	1
GmC2-71	Glyma.07G219900	0	2	96	0	0	2	0	3	5	2	8	9	31	22
GmC2-74	Glyma.07G268400	1	2	69	2	1	3	2	0	1	0	0	0	0	0
GmC2-75	Glyma.07G269000	16	41	7	31	12	7	13	6	9	4	16	3	20	6
GmC2-76	Glyma.08G007500	46	39	35	96	44	47	31	20	21	7	19	18	28	18
GmC2-77	Glyma.08G011900	2	2	2	2	2	2	2	2	2	2	2	2	1	2
GmC2-78	Glyma.08G041800	147	90	3	56	80	98	64	21	16	8	21	12	27	23
GmC2-79	Glyma.08G054500	0	93	0	0	0	0	0	0	0	0	0	0	0	0
GmC2-80	Glyma.08G124000	0	15	10	103	0	2	0	1	2	1	0	0	0	0
GmC2-88	Glyma.09G014700	41	21	9	287	23	39	48	22	19	11	52	31	31	8
GmC2-89	Glyma.09G015700	16	19	13	19	28	38	49	15	9	5	69	10	12	6
GmC2-90	Glyma.09G024400	18	10	16	24	9	25	14	21	22	5	12	9	19	1
GmC2-92	Glyma.09G117100	81	80	30	38	67	102	69	51	37	22	67	64	96	46
GmC2-94	Glyma.09G176900	8	26	50	20	8	15	14	9	9	1	13	7	24	12
GmC2-95	Glyma.09G182700	8	8	0	6	3	5	7	3	1	1	1	0	2	1
GmC2-97	Glyma.09G261200	18	19	12	116	4	6	8	9	9	3	1	2	2	1
GmC2-104	Glyma.10G210000	2	18	20	18	3	4	7	8	24	7	19	16	15	5
GmC2-109	Glyma.11G103300	65	60	62	63	52	48	57	17	24	13	34	30	40	12
GmC2-110	Glyma.11G107300	77	51	74	53	86	88	94	60	53	40	88	63	119	69
GmC2-113	Glyma.11G216900	57	56	41	59	20	21	31	9	9	3	11	12	15	4
GmC2-114	Glyma.11G219000	0	0	33	33	0	0	0	0	1	0	0	0	0	0
GmC2-121	Glyma.12G028200	17	16	42	51	14	12	50	8	26	7	34	16	19	17
GmC2-122	Glyma.12G032400	59	95	63	96	70	68	73	44	40	14	50	43	83	63
GmC2-126	Glyma.13G198600	98	37	38	47	65	48	59	44	38	16	17	37	33	53
GmC2-135	Glyma.14G068400	1	3	1	3	1	1	95	0	0	0	0	0	0	0
GmC2-139	Glyma.14G220000	13	42	99	45	69	85	91	10	19	4	10	3	5	1
GmC2-143	Glyma.15G120400	31	29	3	10	28	63	42	32	19	12	16	13	18	7
GmC2-144	Glyma.15G121500	21	63	43	56	25	56	38	27	17	3	9	4	3	21
GmC2-145	Glyma.15G130300	52	38	31	37	20	24	26	19	16	7	26	16	26	6
GmC2-148	Glyma.15G245600	21	29	126	315	24	11	12	18	24	13	30	23	35	17
GmC2-152	Glyma.17G004700	13	17	0	6	8	3	6	5	2	3	4	9	9	5
GmC2-155	Glyma.17G259000	142	92	16	14	98	111	96	18	10	10	16	15	9	4
GmC2-161	Glyma.18G038400	0	0	90	75	0	0	0	0	0	0	0	0	0	0
GmC2-162	Glyma.18G039700	18	20	12	24	2	7	4	0	2	2	4	3	12	6
GmC2-170	Glyma.19G070700	18	43	81	54	30	28	38	21	37	13	24	22	42	30
GmC2-171	Glyma.19G070800	0	102	0	0	0	0	0	0	0	0	0	0	0	0
GmC2-173	Glyma.19G239500	5	14	10	108	3	1	2	9	6	3	2	2	0	0
GmC2-179	Glyma.20G180600	1	5	26	4	10	7	3	12	30	9	33	17	24	7
